# Supplementary material
Source: publisher figshare collection journal article supplement (https://future-science-group.figshare.com/articles/dataset/_/14709666)

Step 1

Compound 38

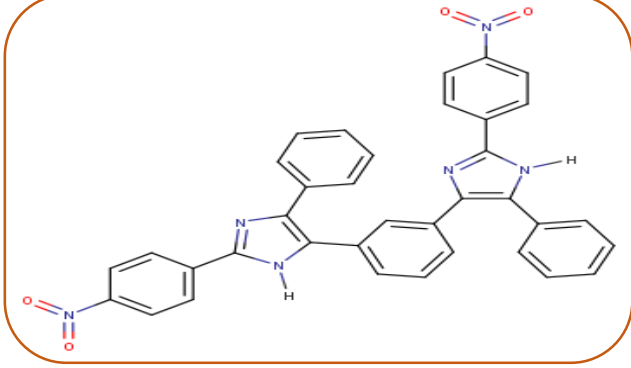

Step 1

Molecular docking

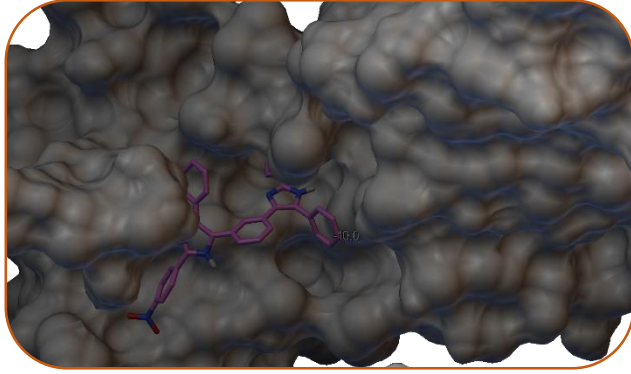

Step 1

Hit Screening

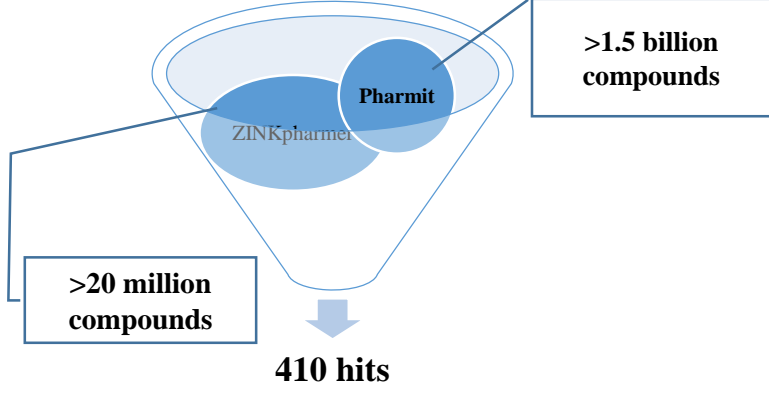

Step 1

Pharmacophore modeling

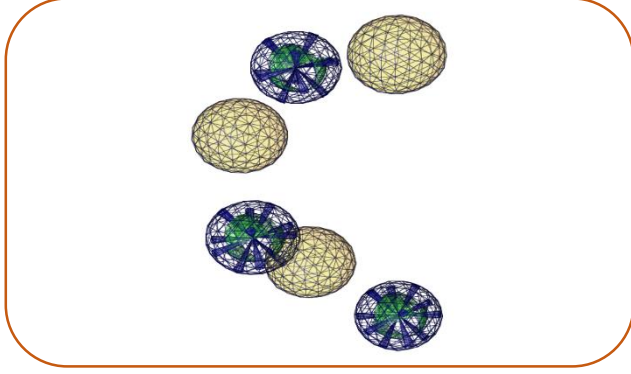

Step 1

3D Structure prediction

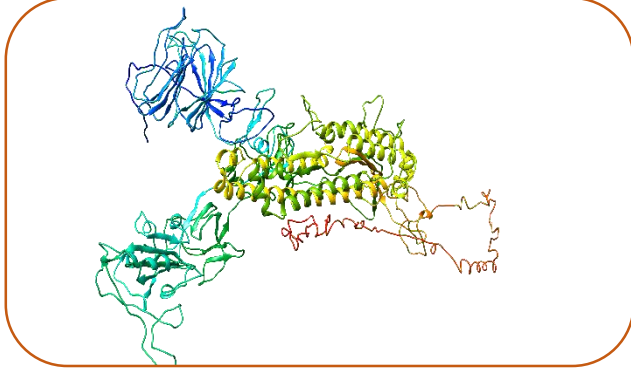

Supplement: Supplementary file [file 1]
