# Supplementary material
Source: publisher figshare collection journal article supplement (https://future-science-group.figshare.com/articles/dataset/_/14709666)
Supplement: Supplementary file [file 1]

**Library.** SMILES of 10 derivatives of Compound 38.

1. c1(cc(ccc1)C1=C(N=C(c1Ncccc11)c1ccc(cc1)[N+](=O)[O-])c1cccc1)c1nc([nH]c1c1cccc1)c1ccc(cc1)[N+](=O)[O-]
2. c1(cc(ccc1)C1=C(N=C(c1cNcccc11)c1ccc(cc1)[N+](=O)[O-])c1cccc1)c1nc([nH]c1c1cccc1)c1ccc(cc1)[N+](=O)[O-]
3. c1(cc(ccc1)C1=C(N=C(c1ccNcc11)c1ccc(cc1)[N+](=O)[O-])c1cccc1)c1nc([nH]c1c1cccc1)c1ccc(cc1)[N+](=O)[O-]
4. c1(cc(ccc1)C1=C(N=C(Nc1cccc11)c1ccc(cc1)[N+](=O)[O-])c1cccc1)c1nc([nH]c1c1cccc1)c1ccc(cc1)[N+](=O)[O-]
5. c1(cc(ccc1)C1=C(N=C(Br1)c1ccc(cc1)[N+](=O)[O-])c1cccc1)c1nc([nH]c1c1cccc1)c1ccc(cc1)[N+](=O)[O-]
6. c1(cc(ccc1)C1=C(N=C(Cl1)c1ccc(cc1)[N+](=O)[O-])c1cccc1)c1nc([nH]c1c1cccc1)c1ccc(cc1)[N+](=O)[O-]
7. c1(cc(ccc1)C1=C(N=C(C1)c1ccc(cc1)[N+](=O)[O-])c1cccc1)c1nc([nH]c1c1cccc1)c1ccc(cc1)[N+](=O)[O-]
8. c1(cc(ccc1)C1=C(N=C(CCO1)c1ccc(cc1)[N+](=O)[O-])c1cccc1)c1nc([nH]c1c1cccc1)c1ccc(cc1)[N+](=O)[O-]
9. c1(cc(ccc1)C1=C(N=C(CCN1)c1ccc(cc1)[N+](=O)[O-])c1cccc1)c1nc([nH]c1c1cccc1)c1ccc(cc1)[N+](=O)[O-]
10. c1(cc(ccc1)C1=C(N=C(H1)c1ccc(cc1)[N+](=O)[O-])c1cccc1)c1nc([nH]c1c1cccc1)c1ccc(cc1)[N+](=O)[O-]
